# Supplementary material for: The effect of a loss of model structural detail due to network skeletonization on contamination warning system design: case studies
Source: Copernicus journal article supplement (doi:10.5194/dwes-11-49-2018), 2018-05-02
Supplement: Supplementary file 1 [file dwes-11-49-2018-supplement.zip]

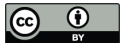

## *Supplement of*

# **The effect of a loss of model structural detail due to network skeletonization on contamination warning system design: case studies**

**Michael J. Davis and Robert Janke**

*Correspondence to:* Michael J. Davis ([mike\\_davis@anl.gov](mailto:mike_davis@anl.gov)) and Robert Janke ([janke.robert@epa.gov](mailto:janke.robert@epa.gov))

- [dwes-11-49-2018-supplement-title-page.pdf](#)
- [N1\\_20cm\\_SKEL\\_DWES\\_2017\\_Davis\\_Janke.inp](#)
- [N1\\_30cm\\_SKEL\\_DWES\\_2017\\_Davis\\_Janke.inp](#)
- [N1\\_40cm\\_SKEL\\_DWES\\_2017\\_Davis\\_Janke.inp](#)
- [N1\\_Original\\_DWES\\_2017\\_Davis\\_Janke.inp](#)

The copyright of individual parts of the supplement might differ from the CC BY 4.0 License.
